# Supplementary material for: Vaspin inhibits kallikrein 7 by serpin mechanism
Source: Springer Nature journal article supplement (doi:10.1007/s00018-013-1258-8), 2013-01-30

## Vaspin inhibits kallikrein 7 by serpin mechanism

John T. Heiker<sup>1,4</sup>, Nora Klötting<sup>2,4</sup>, Peter Kovacs<sup>2</sup>, E. Bartholomeus Kuettner<sup>3</sup>, Norbert Sträter<sup>3</sup>, Stephan Schultz<sup>1</sup>, Matthias Kern<sup>2</sup>, Michael Stumvoll<sup>2</sup>, Matthias Blüher<sup>2\*</sup> and Annette G. Beck-Sickinger<sup>1\*</sup>

<sup>1</sup> Institute of Biochemistry, Faculty of Biosciences, Pharmacy and Psychology, Universität Leipzig, 04103 Leipzig, Germany

<sup>2</sup> Department of Internal Medicine, Universität Leipzig, 04103 Leipzig, Germany

<sup>3</sup> Center for Biotechnology and Biomedicine, Institute of Bioanalytical Chemistry, Faculty of Chemistry and Mineralogy, Universität Leipzig, 04103 Leipzig, Germany

### Supplementary Figure S1

**Analytics of purified recombinant vaspin, photograph of analyzed vaspin crystals, superposition of  $\alpha$ -traces of vaspin and  $\alpha$ 1- antitrypsin and sequence alignment of vaspin and classical serpins.** (A) SDS-Page analysis of purified recombinant vaspin (lane 1 whole cell lysate, lane 2 purified vaspin). (B) Western blot of purified vaspin using anti-vaspin antibody. (C) Analytical HPLC of purified vaspin (water/acetonitrile gradient with 0.1% TFA from 20-80% in 30 min. (D). MALDI-TOF spectrum of vaspin in linear mode ( $[M_{\text{avg}}+H]^{1+}_{\text{theoretical}}=47648$ . Together with the singly charged ion doubly, triply and quadruply charged ions are observed ( $[M_{\text{avg}}+2H]^{2+}_{\text{theor.}}=23825$ ,  $[M_{\text{avg}}+3H]^{3+}_{\text{theor.}}=15883$ ,  $[M_{\text{avg}}+4H]^{4+}_{\text{theor.}}=11912$ ). (E) Vaspin crystals of space group C2 as used for structure determination. (F) Superposition of alpha-carbon traces of vaspin (red –  $\alpha$ -helical, blue –  $\beta$ -fold, grey – loop region) and  $\alpha$ 1- antitrypsin (black, PDB id 1QLP [1]) as the best matching known protein structure (DALI [2], rmsd = 1.7 Å for 362 out of 375 residues, 41 % sequence identity). Vaspin residues shown in orange are flexible in the crystal structure. (G) Sequence alignment of vaspin, antitrypsin, antithrombin and antichymotrypsin correlated with structural features of vaspin (UniProt numbers: vaspin - Q8IW75, antitrypsin - P01009, antithrombin - P01008, antichymotrypsin - P01011). Sequences are without signal peptide. Letter/color code: white letters/black background - fully conserved, white letters/grey background - mostly conserved, black letters/grey background - often conserved.

### Supplementary Figure S2

**hK7 inhibition by vaspin: stoichiometry of inhibition and association rate constant,  $k_{\text{ass}}$ .** (A) The stoichiometry of inhibition of factor hK7 is taken as the x-intercept of the linear regression when residual protease activity is plotted against the ratio of vaspin to protease. (B) Determination of association rate constant,  $k_{\text{ass}}$ , of hK7 inhibition by vaspin.  $k_{\text{ass}}$  was determined by plotting  $\ln[\text{remaining activity}]$  vs. time of incubation. The constant  $k_{\text{ass}}$  was calculated based on the equations  $\ln[E] = -k_{\text{obs}} \cdot t$  and  $k_{\text{ass}} = k_{\text{obs}}/[I]$ . Data shown are representative of at least four independent experiments.

### Supplementary Figure S3

Variant vaspinT365R is unable to form serpin-hK7 complexes and serves as substrate only as demonstrated by SDS-PAGE and Western Blot analysis. Data shown are representative of at least two independent experiments.

#### Supplementary Figure S4

**MALDI-TOF analysis of vaspin-hK7 complex formation and P1 residue determination.** (A) Predicted cleavage site of hK7 in vaspin RCL sequence and resulting C-terminal fragment vaspin(379-414). (B) Linear mode MALDI-TOF spectra from vaspin-hK7 incubation mixture (top) and vaspin control (bottom). Peaks are corresponding to hK7 band (27 kDa), cleaved vaspin (43.6 kDa), native vaspin (47.6 kDa) and the vaspin-hK7 complex (70 kDa). Doubly charged ion peaks of vaspin (23.8 kDa) and cleaved vaspin (21.8 kDa) are also observed. (C) MALDI-TOF spectrum of the C-terminal vaspin fragment in reflector mode ( $[\text{vaspin}(379-414)+\text{H}]^{1+}_{\text{theor.}}=4037.651$ ) and detailed isotope pattern of the ion peak used for MSMS analysis.

#### Supplementary Figure S5

**MALDI-TOF analysis of insulin degradation by hK7.** (A) Amino acid sequence of insulin A and B chain with intra and inter chain disulfide bonds and identified cleavage sites. Identified fragments are indicated according to MS peaks in (B). (B) MALDI-TOF analysis of control insulin and hK7 digested native insulin after 60 min and 24 h. Primary cleavage sites after 60 min corresponding to cleavage after tyrosine 16 in insulin B chain and tyrosine 14 in insulin A chain ( $[\text{insulin B chain (F}^1\text{-Y}^{16})+\text{H}]^{1+}_{\text{theoretical}}=1617.84$  (1),  $[\text{insulin B chain (L}^{17}\text{-T}^{30})+\text{H}]^{1+}_{\text{theoretical}}=1829.92$  (2),  $[\text{insulin A chain (G}^1\text{-Y}^{14})+\text{Na}]^{1+}_{\text{theoretical}}=1540.64$  (3)). A secondary cleavage site after tyrosine 26 of insulin B-chain is observed after prolonged incubation for 24 h ( $[\text{insulin B chain (L}^{17}\text{-Y}^{26})+\text{H}]^{1+}_{\text{theoretical}}=1190.59$  (4)). Peak identities were confirmed by MALDI-TOF-MSMS analysis of insulin fragments.

#### Supplementary Figure S6

**Western blot analysis of isolated islets and negative controls for fluorescence immunohistology of murine pancreas slides.** (A) Vaspin protein expression in the lysate of isolated islets of male C57BL/6JRj mice detected by anti vaspin antibody with recombinant vaspin as control. (B) Insulin and (C) glucagon double staining with secondary antibody controls in pancreatic islets of C57BL/6JRj mice by fluorescence immunohistology (B: insulin (Cy3-channel, red) and secondary antibody control (FITC-channel, green); C: glucagon (FITC-channel, green) and secondary antibody control (Cy3-channel, red); B+C: nuclei: DAPI-channel, blue).

#### Supplementary Figure S7

**Vaspin treatment of isolated pancreatic islets from C57BL/6JRj mice** (A) Absolute values for insulin release (ng/islet/h) and insulin islet content (ng/islet) corresponding to Figure 6A and B. (B) Absolute values for insulin release (ng/islet/h) and islet content (ng/islet) for vaspin treated islets (10ng/ml). \*,  $p < 0.05$  for vaspin versus control.

#### Supplementary References

1. Dementiev A, Simonovic M, Volz K, Gettins PG (2003) Canonical inhibitor-like interactions explain reactivity of alpha1-proteinase inhibitor Pittsburgh and antithrombin with proteinases. *J Biol Chem* 278 (39):37881-37887
2. Holm L, Kaariainen S, Rosenstrom P, Schenkel A (2008) Searching protein structure databases with DaliLite v.3. *Bioinformatics* 24 (23):2780-2781

# Supplementary Figure 1

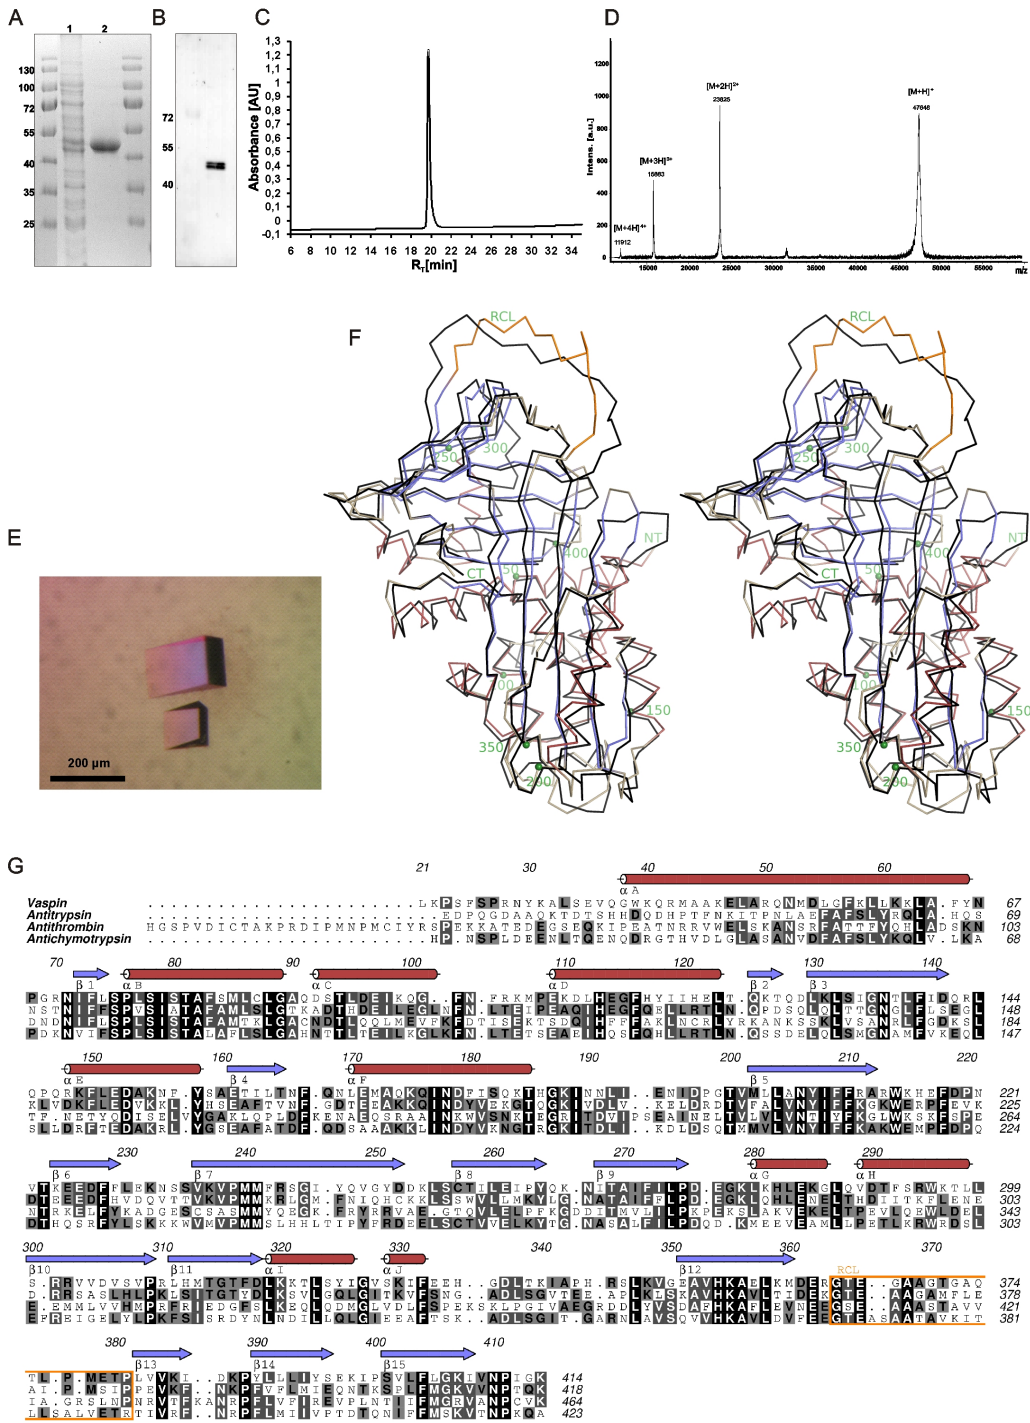

## Supplementary Figure 2

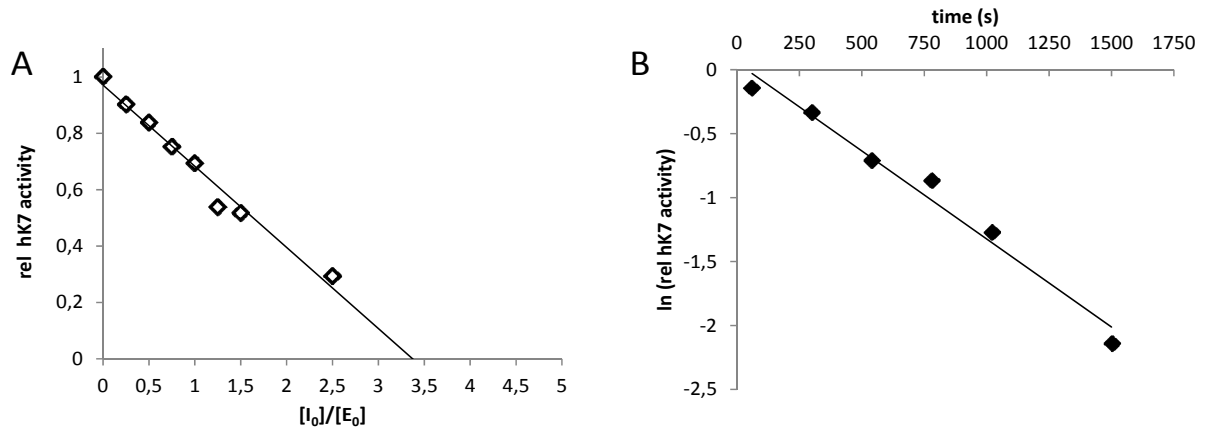

## Supplementary Figure 3

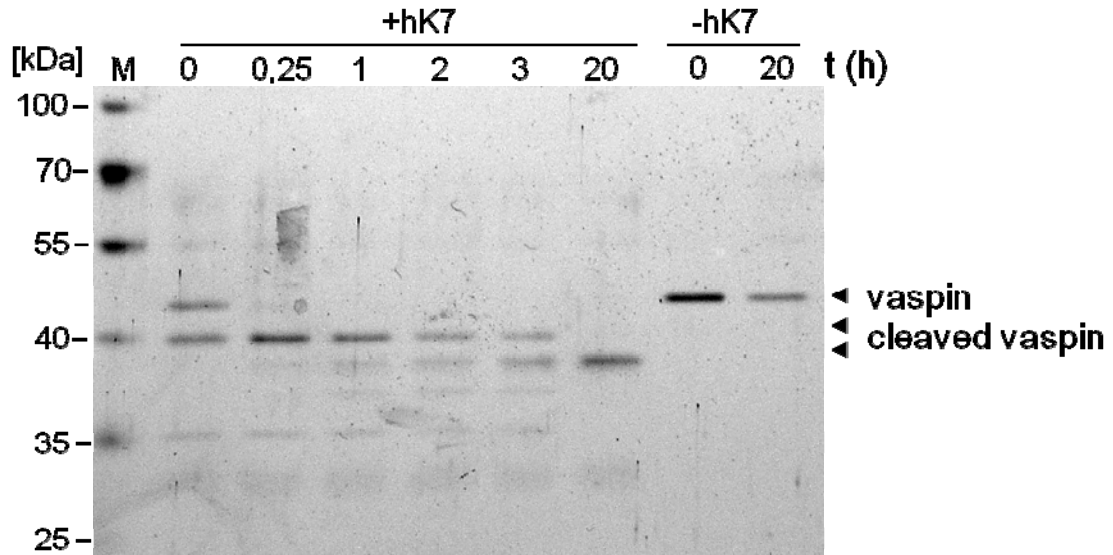

# Supplementary Figure 4

A **G**<sup>364</sup>TEGAAGTGAQTLPM<sup>378</sup>-**E**<sup>379</sup>TPLVVKIDKPYLLLIYSEKIPSVLFLGKIVNPIGK<sup>414</sup> [Vaspin(379-414) + H]<sup>1+</sup><sub>theor.</sub> = 4037,651

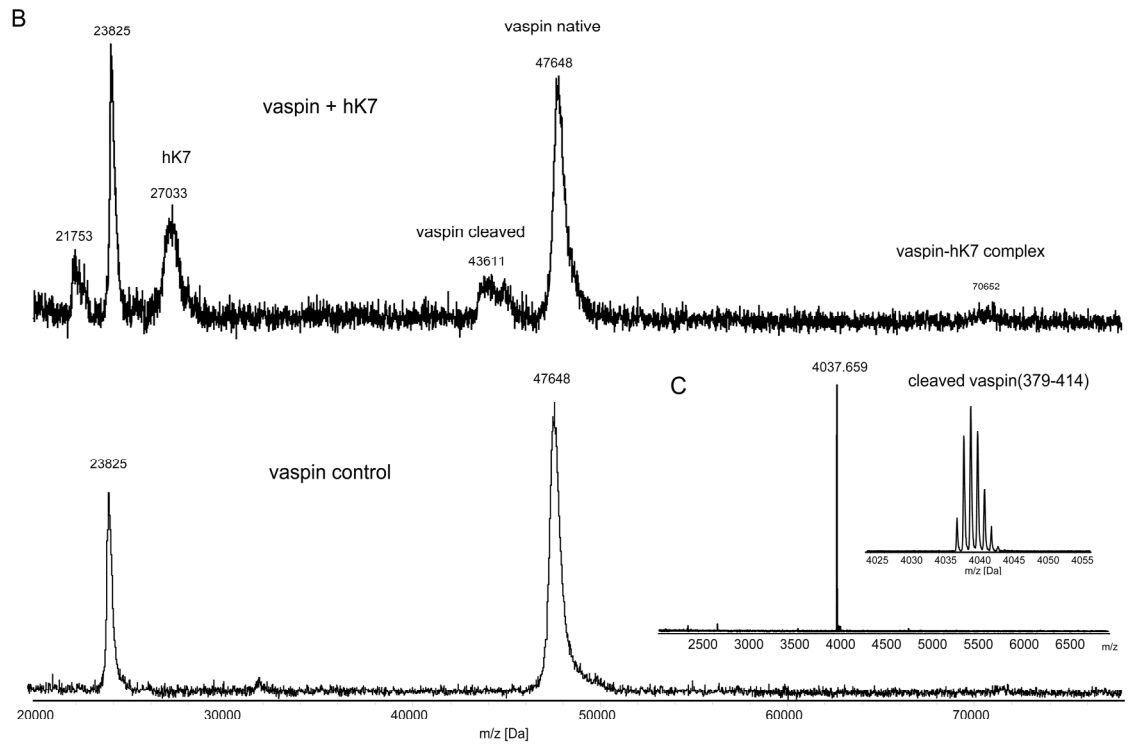



# Supplementary Figure 6

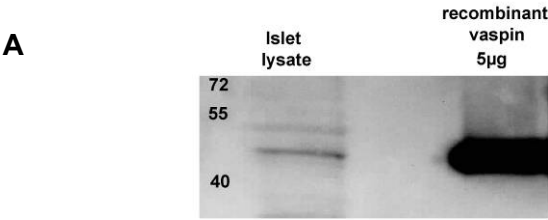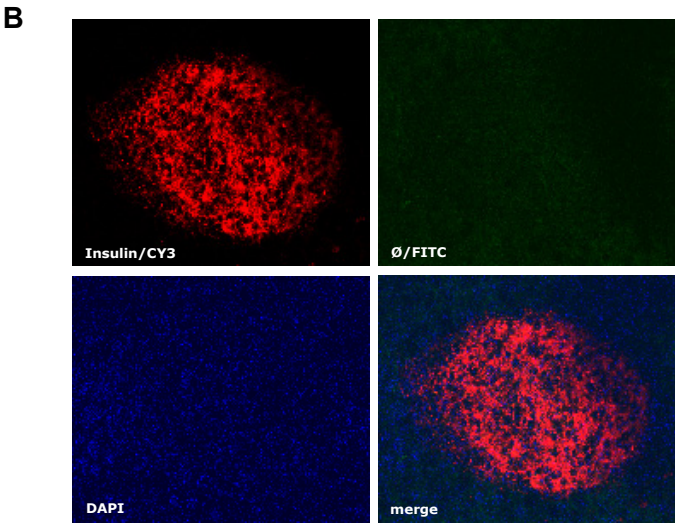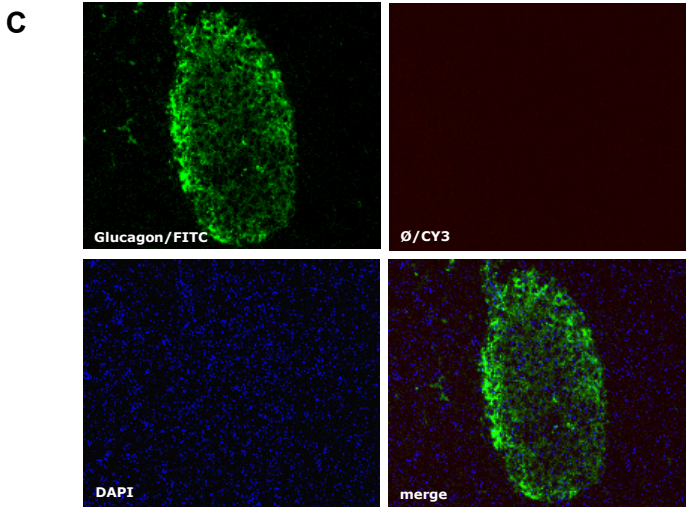

# Supplementary Figure 7

**A**

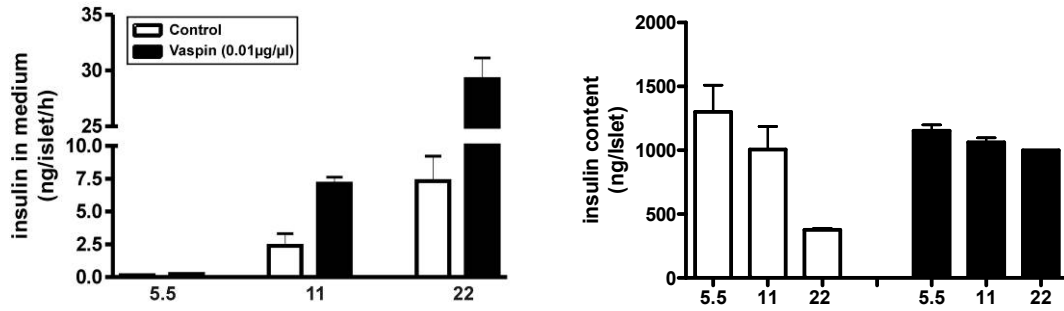

**B**

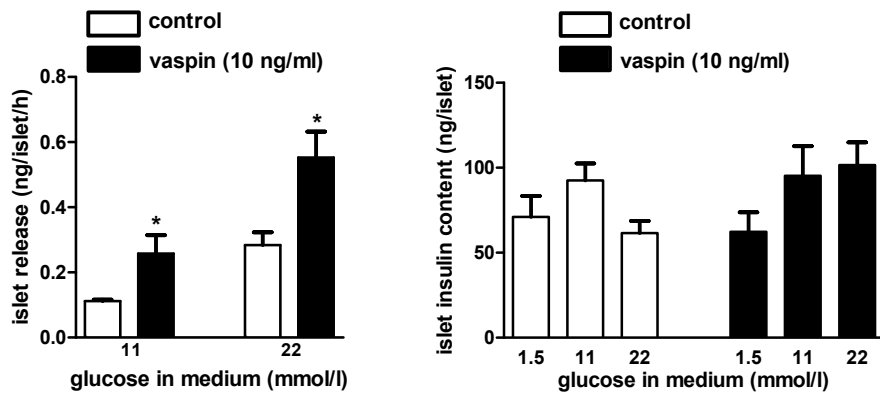

Supplement: 18_2013_1258_MOESM1_ESM.pdf [file 18_2013_1258_MOESM1_ESM.pdf]
